# Supplementary material for: SWI/SNF and RSC cooperate to reposition and evict promoter nucleosomes at highly expressed genes in yeast
Source: PubMed Central journal article supplement — Genes Dev. 2018 May 1;32(9-10):695–710. doi: 10.1101/gad.312850.118 (PMC6004078; doi:10.1101/gad.312850.118), 2018-05-01
Supplement: supp_gad.312850.118_Supplemental_materials.pdf [file supp_gad.312850.118_Supplemental_materials.pdf]

**Supplementary Material for:**

**SWI/SNF and RSC cooperate to reposition and evict promoter  
nucleosomes at highly expressed genes in yeast**

## Supplementary Materials and Methods

### Plasmid and yeast strain construction

Construction of strains carrying doxycycline repressible alleles of *STH1* were generated by replacing the *STH1* native promoter with *HIS3MX-tTA-tetO* DNA cassette. The cassette was PCR-amplified from plasmid pHQ2078 (Qiu et al. 2015) using forward primer: 5'-  
*CTTAAGAGGAAAAAGAGTATAGAGAAAAACAAAGGCAATCAGCGGCTAATTTGGTGGAAATAACAACA*  
*CACAGCTGAAGCTTCGTACGC* 3' (with *STH1* promoter sequences -100 to -31 italicized) and reverse primer: 5'-  
*CCAATGCGGCAACTGTTGTAGGTGTATTATTCATCACCGTGCTCATCAACTCAGATTGTTCTGAAGCATA*  
*TAGGCCACTAGTGGATCTG* 3' (with *STH1* CDS sequences +70 to +1 italicized), and used to transform F729 to His<sup>+</sup> and thereby generate *P<sub>TET</sub>-STH1* strain HQY1632. The *HIS3MX-tTA-tetO* DNA cassette was alternatively recovered from plasmid pHQ2100 by *StuI* digestion and used to transform strain F748 to generate *snf2Δ P<sub>TET</sub>-STH1* strain HQY1660. Replacement of the *STH1* promoter with the *HIS3MX-tTA-tetO<sub>2</sub>* cassette was confirmed by PCR analysis and Western blot analysis of Sth1 expression using antibody sc-33290 (Santa Cruz Biotechnology). Plasmid pHQ2100 was generated by inserting a 370bp *STH1* 5'UTR fragment between the *HindIII*-*BglII* sites, and a 340 bp *STH1* 5' ORF fragment (beginning with the ATG codon) between the *BamHI*-*HpaI* sites, in pHQ2078. Yeast strains with C-terminally Myc<sub>13</sub>-tagged *SNF2-myc* (HQY367) or *STH1-myc* (HQY459) were previously described (Swanson et al. 2003).

### MNase-ChIP-seq analysis of H3.

For MNase-ChIP-seq, yeast cells were grown, treated with SM and cross-linked with formaldehyde as described for CHIP-seq (Qiu et al. 2015), except cells were grown in 500ml cultures and harvested as 5 equal aliquots. Cells were lysed with glass beads in FA lysis buffer (50 mM Hepes-KOH [pH 7.5], 140 mM NaCl, 1 mM EDTA, 1% Triton X-100, 0.1% sodium deoxycholate, 1 mM PMSF, 1X cOmplete Protease Inhibitor Cocktail EDTA free, Roche), the chromatin-rich fraction was recovered and digested with MNase nuclease as described (Wal and Pugh 2012), with the following modifications. Each chromatin pellet was first washed with FA lysis buffer, followed by NP-S buffer (0.5 mM Spermidine, 0.075% (v/v) NP-40, 50 mM NaCl, 10 mM Tris-Cl, pH 7.5, 5 mM MgCl<sub>2</sub>, 1 mM CaCl<sub>2</sub>), resuspended in 0.3ml NP-S buffer with 1 mM 2-mercaptoethanol, and digested with different amounts of MNase (Worthington Biochemical, 10 U/  $\mu$ L stock) for 10min at 30°C. MNase digestion was stopped by adding EDTA to 10 mM and transferring digests to ice for 10min. Digested chromatin was separated from cell debris by high speed centrifugation at 4°C, suspended in 0.3ml NP-S buffer with 0.2% SDS, and incubated 5 min before collecting by centrifugation. Both supernatants were combined and saved as MNase-digested chromatin; and 100 $\mu$ L aliquots were adjusted to 200 $\mu$ L with NP-S buffer and examined for input analysis as described previously (Qiu et al. 2015) for sonicated chromatin. For each yeast strain, MNase digestion giving 70-80% mononucleosomes were selected for immunoprecipitation, as follows. Aliquots containing 5.0 $\mu$ g of DNA were adjusted to 500 $\mu$ L using NP-S buffer and 1X FA lysis buffer from 4X stock and mixed with 2 $\mu$ g anti-H3 antibodies (Abcam) conjugated with anti-rabbit dynabeads and immunoprecipitated overnight. Immune complexes were washed and treated to reverse cross-linking, DNA was precipitated, and

paired-end libraries were prepared and sequenced as described previously (Qiu et al. 2015) for ChIP-seq of sonicated samples.

### **Estimation of the positions of +1/-1 nucleosomes**

To determine the median positions of +1 and -1 nucleosomes for each gene and all strains, we first used the MNase-ChIP-seq data and the method described in (Qiu et al. 2015) to identify the typical positions of these nucleosomes. Those values were then refined using the following algorithm. For each position of +1/-1 nucleosomes identified using the method described in Qiu et al. 2015, we used a symmetrical window of 147 bp and computed all nucleosome dyad positions that were mapped by MNase-ChIP-seq in this window and the corresponding median position. This position was used as an estimation of the median nucleosome position in a population of cells. The estimated positions of +1/-1 nucleosomes, NDR center and NDR width for uninduced and induced WT and examined mutants are listed in Table S3.

### **Estimation of typical inter-nucleosomal spacing**

To estimate the typical nucleosome spacing, for each gene we first used k-means clustering to identify the 5 clusters of MNase-ChIP-seq reads corresponding to nucleosomes +1, +2, +3, +4, +5, using the *kmeans* function in MATLAB. Then we performed a linear regression using the positions of all read centers belonging to the 5 clusters, using the *fitlm* function in MATLAB, and the regression coefficient (the slope of the fitted line) that we obtained was used to estimate the typical inter-nucleosomal spacing for each yeast gene.

**Identification of nucleosomes not evicted from NDRs in the *P<sub>TET</sub>-STH1 snf2Δ* mutant**

An iterative algorithm was used to identify nucleosomes located within NDRs of the of the *P<sub>TET</sub>-STH1 snf2Δ* strain but absent in WT. For each gene, we first tiled the whole NDR with overlapping windows of 147bp shifted by 50bp from each other. Then we computed the locations of the MNase-ChIP-seq read centers found in each window, and the corresponding median position of the reads. Each window was then shifted to be centered at the median position and the procedure was repeated until all of the median positions of the reads were at most 1bp apart from the center of the corresponding window (i.e. until all window shifts that were needed for the next iteration were  $\leq 1$  bp). The centers of the final windows indicate the median positions for the clusters of nucleosome dyads corresponding to nucleosomes that occupy similar positions in a population of cells, i.e. typical positions of the nucleosomes in the *P<sub>TET</sub>-STH1 snf2Δ* double mutant. Out of these positions, we filtered and retained the positions where the nucleosome occupancy was  $\leq 0.25$  in the WT strain, and  $\geq 0.4$  in the double mutant. Then we manually inspected the gene promoters that were depleted in WT cells but occupied by nucleosomes in *P<sub>TET</sub>-STH1 snf2Δ* cells, and split these into the 3 groups shown in Fig. 6D.

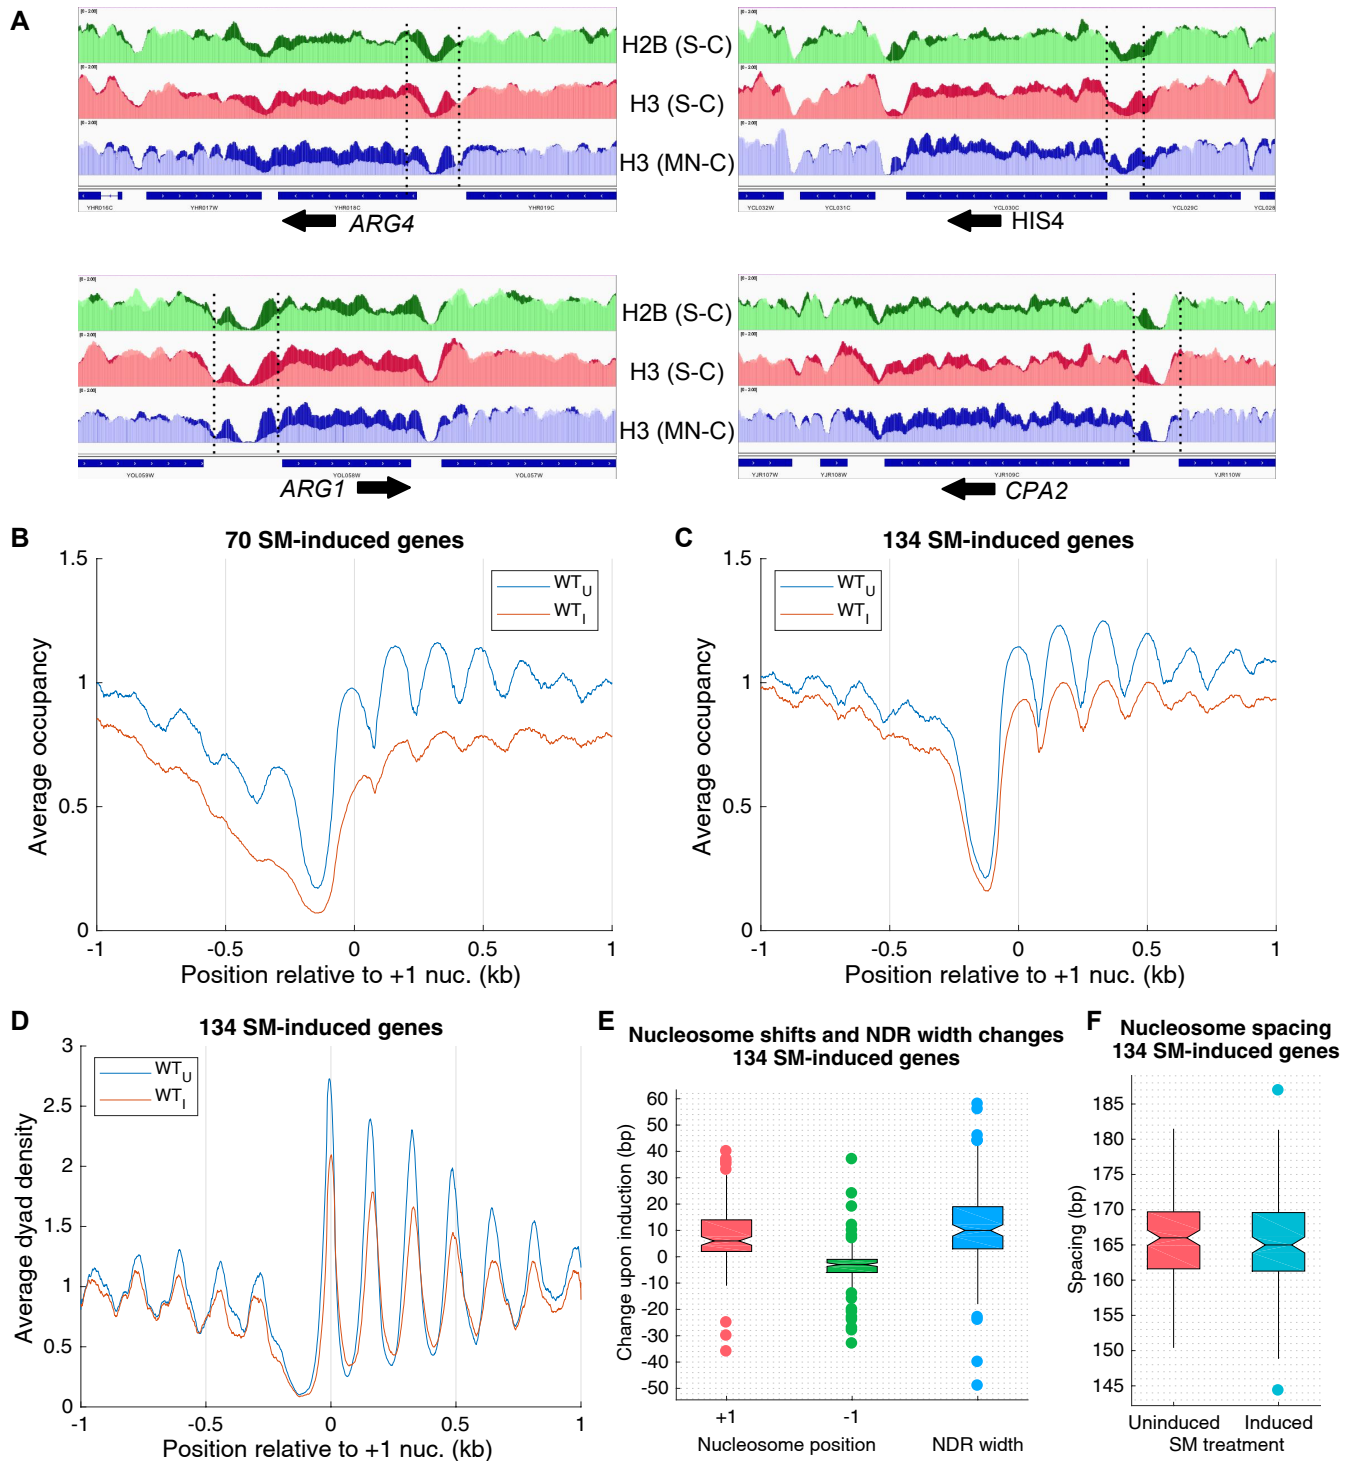

**Figure S1. Supporting evidence for eviction and sliding of promoter nucleosomes at SM-induced genes in WT cells.** (A) IGV profiles of histone H2B and H3 occupancies from ChIP-seq with sonicated chromatin (S-C) (50-150 bp reads), and H3 occupancies from MNase-ChIP-seq (MN-C) (50-200 bp reads), for canonical Gcn4 target genes *ARG1*, *ARG4*, *HIS4* and *CPA2*, before (darker colors) and after (lighter colors) SM treatment. (B, C) Plots of normalized and averaged H3 occupancies at each base pair aligned to the +1 nucleosome calculated from MNase-ChIP-seq data for the 70 exemplar SM-induced genes (B), or for the remaining 134 less-remodeled SM-induced genes (C). Blue and red profiles, results from uninduced and SM-induced WT cultures, respectively. (D) Average dyad densities aligned to the +1\_Nuc for the 134 SM-induced genes, depicted as in Fig. 1E. Average profiles were smoothed using a moving average filter with a span of 31 bp. (E) Boxplots depicting shifts in +1 and -1 nucleosome positions, and changes in NDR widths, for the 134 SM-induced genes, analyzed as in Fig. 1F. (F) Boxplots depicting nucleosome spacing for the array of +1 to +5 nucleosomes, for the 134 SM-induced genes in uninduced and SM-induced WT cells, as in Fig. 1G.

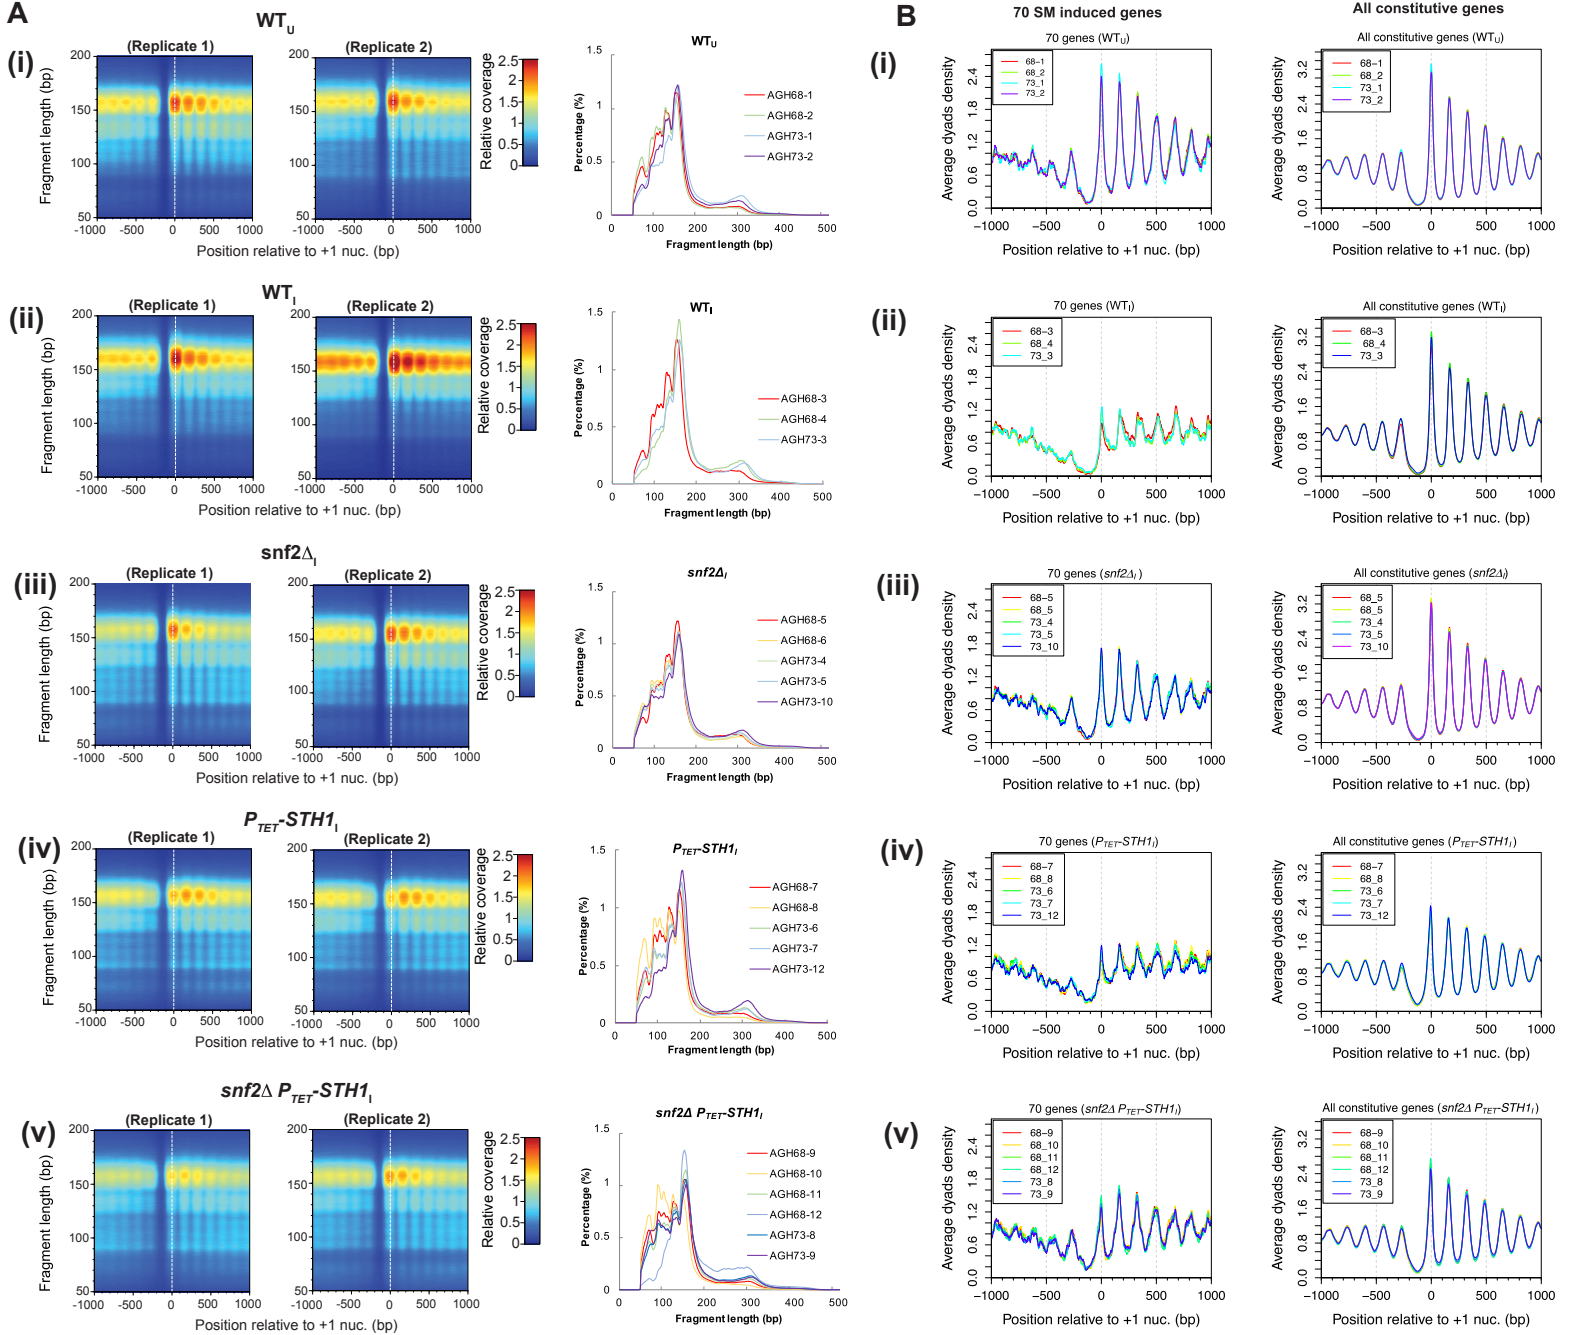



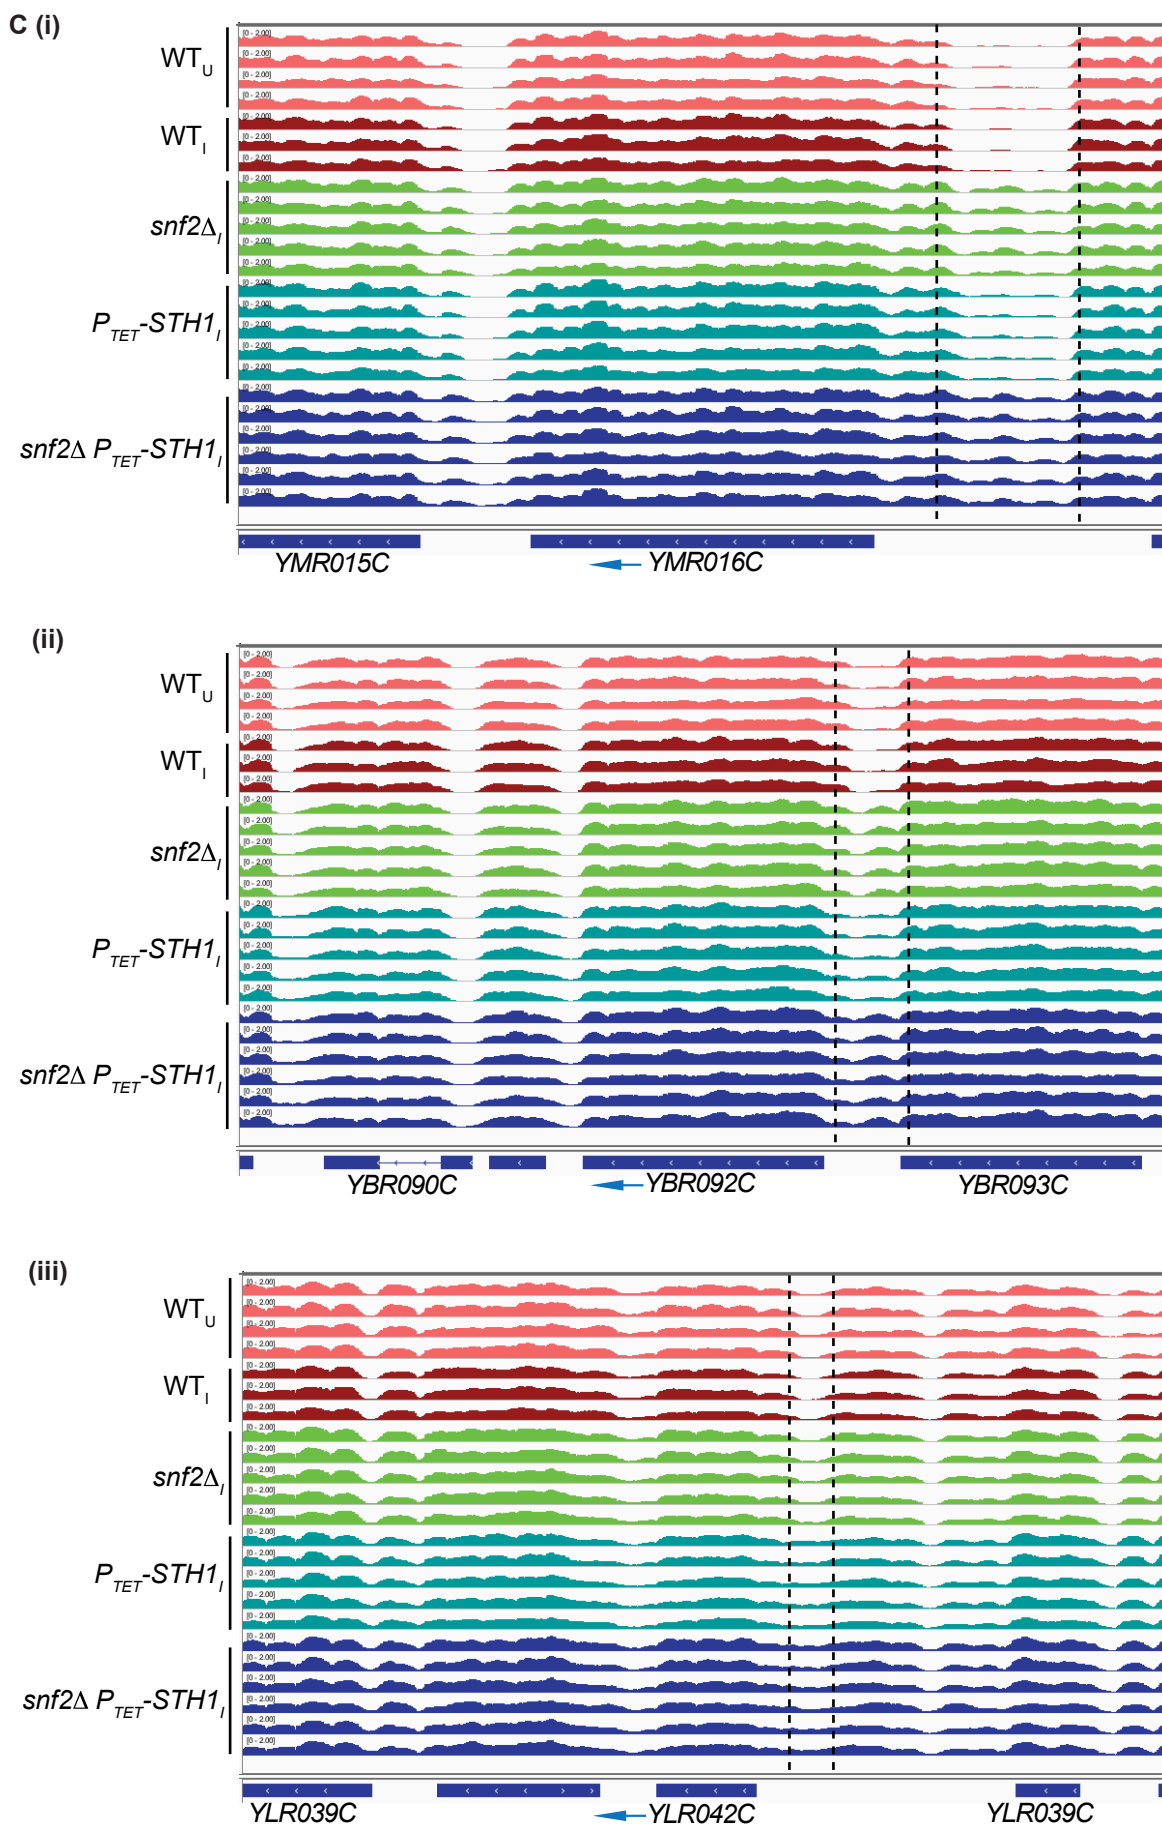

**Figure S2. Variations in fragment length distributions in replicates of H3 MNase-ChIP-seq experiments do not affect determinations of average nucleosome dyad positions or nucleosome occupancies for the groups of 70 SM-induced genes or all constitutive genes.** (A) 2D occupancy plots (see Chereji et al. 2017 and <https://github.com/rchereji/plot2DO>) indicating the relative coverage of the MNase-ChIP-seq fragments of different lengths (50-200 bp), in 2 kb regions centered on the +1 nucleosome dyads of all yeast genes. The X axis indicates the position relative to the +1 nucleosome dyad, the Y axis indicates DNA fragment length, and the color at position (x, y) represents the relative coverage obtained by stacking all the DNA fragments of length y that covered position x. Red indicates high coverage, while dark blue indicates zero coverage. Two biological replicates are shown for uninduced or SM-induced WT (i, ii), or the indicated mutants under inducing conditions (iii-v). On the right, the histogram of MNase-ChIP-seq fragment lengths (i.e. percentages of total reads for each fragment length) are plotted for all biological replicates for each strain/condition depicted on the left. (B) Average nucleosome dyad densities in 2 kb regions centered on the typical positions of the +1 nucleosomes for the group of 70 SM-induced genes (left column) and all constitutive genes (right column), calculated as in Fig. 1E for each biological replicate of MNase-ChIP-seq data obtained for the five indicated strains/conditions analyzed in this study. Average dyad density plots shown in all other figures were calculated after pooling the reads from all replicates for each strain. (C) IGV profiles of histone H3 occupancies from MNase-ChIP-seq of three genes, analyzed in Fig. 5B, calculated from each biological replicate of the five indicated strains/conditions analyzed in this study.

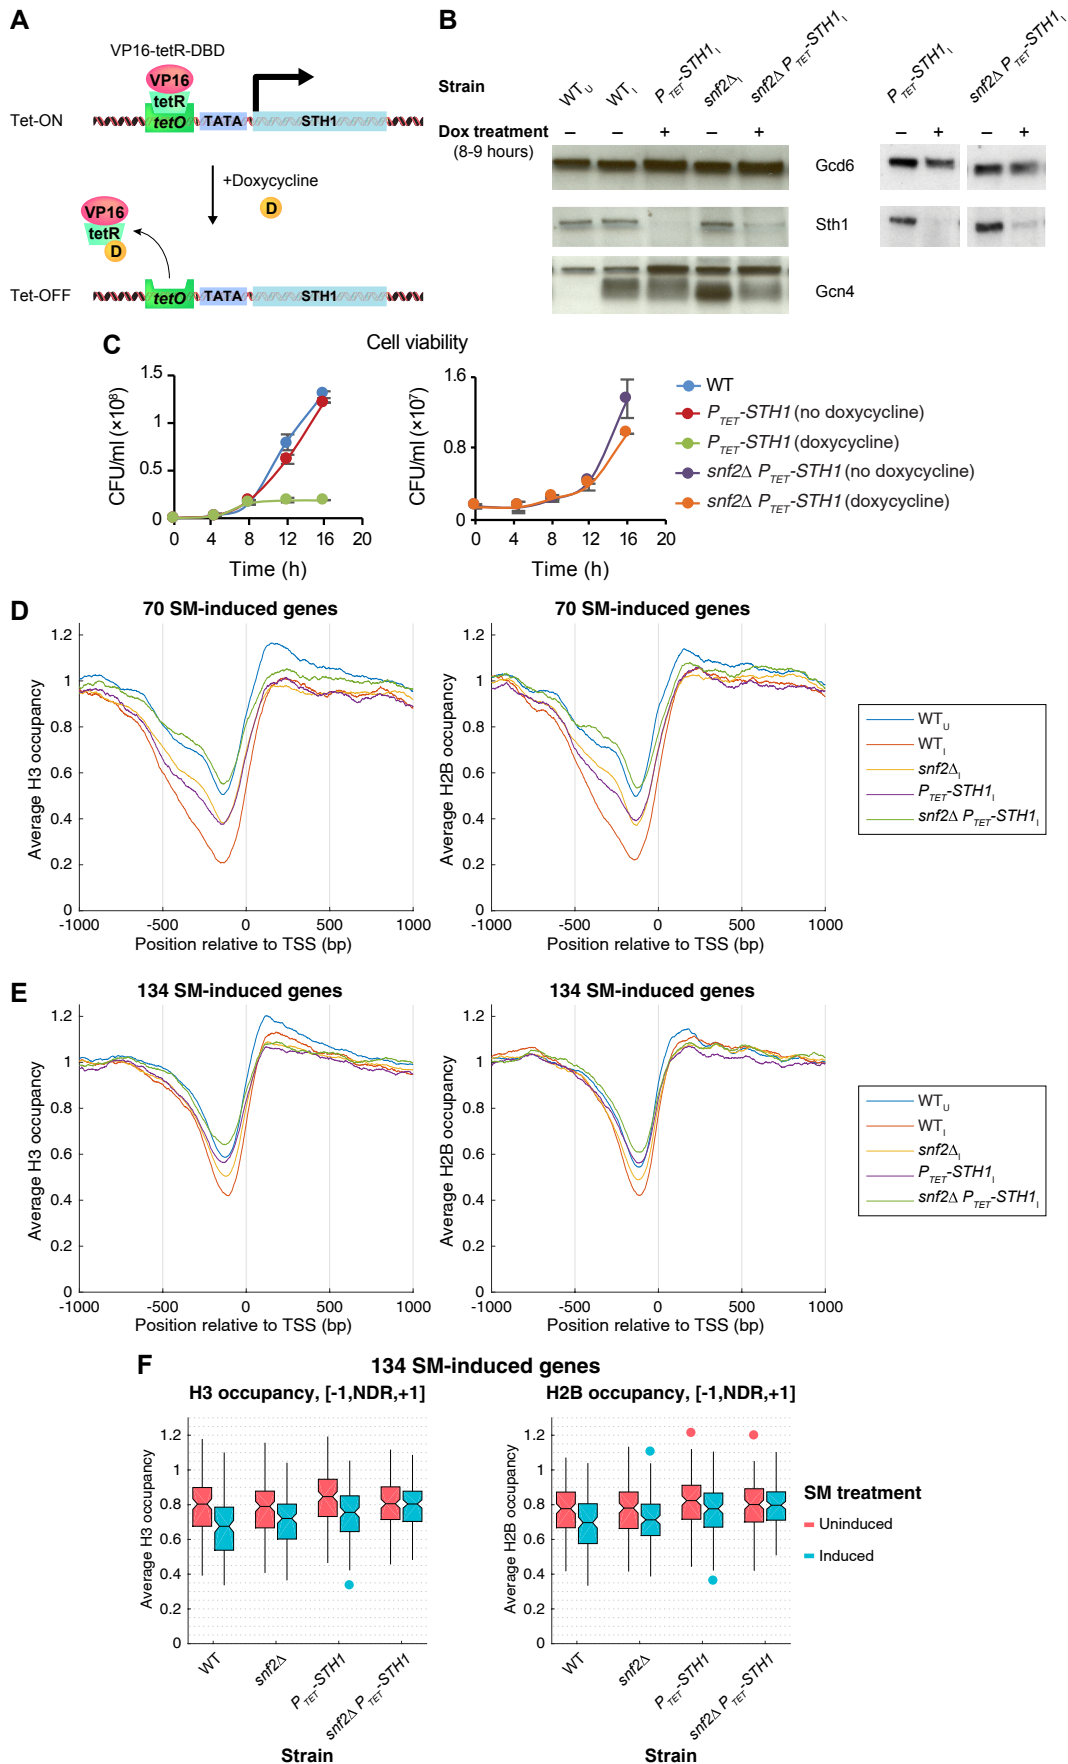

**Figure S3. Supporting evidence for defects in eviction of promoter nucleosomes at SM-induced genes in the three remodeler mutants.** (A) Diagram depicting regulation of *STH1* transcription from the tetracycline-repressible promoter. Binding of tetracycline analog doxycycline to the VP16-tetR-DBD activator protein, expressed from the promoter cassette, releases it from the *tetO* operator, turning off transcription of the  $P_{TET}$ -*STH1* allele. (B) Western analysis of whole cell extracts of strains of the indicated genotype cultured in SC-ILV medium and treated (+) or left untreated (-) with 10  $\mu\text{g/ml}$  doxycycline for 8-9h, using antibodies against Gcd6 (loading control), Sth1 or Gcn4. For induced samples (lanes 2-5), cells were treated with SM for 25 min as for ChIP-seq analysis. (C) Strains of indicated genotypes were cultured in SC-ILV medium with 10  $\mu\text{g/ml}$  doxycycline or no doxycycline, from an initial  $A_{600}$  of 0.075, and cell viability was estimated by plating dilutions of culture aliquots, collected at 4h intervals, on YPD agar plates and calculating colony forming units (CFU) per ml. As eliminating *SNF2* decreases vegetative growth, the effect of depleting Sth1 is shown separately in *SNF2* and *snf2 $\Delta$*  cells (*right*; note difference in y-axis scale). No decrease in CFU was observed between 8-16h incubation in the presence of doxycycline. (D, E) Plots of averaged H3 or H2B occupancies at each base pair aligned to the TSS calculated from ChIP-seq data for (D) 70 or (E) 134 SM-induced genes for the indicated yeast strains, as in Fig. 1 A. (F) Notched box plots of H2B or H3 occupancies per nucleotide in the [-1,NDR,+1] regions calculated from ChIP-seq data from at least three replicates of the indicated yeast strains for the group of 134 SM-induced.

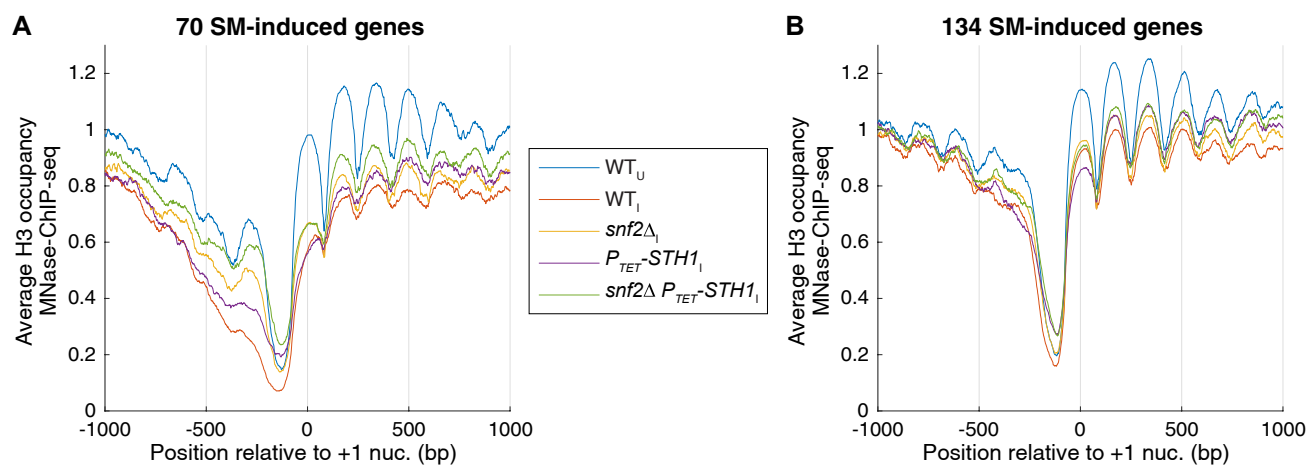

**Figure S4. Additional supporting evidence for defects in nucleosome eviction at SM-induced genes in the remodeler mutants.** (A, B) Plots of averaged H3 occupancies at each base pair aligned to the +1 nucleosome calculated from H3 MNase-ChIP-seq data for the groups of (A) 70 and (B) 134 SM-induced genes for the indicated strains. For each gene, reads were normalized to the average occupancy on the respective chromosome.

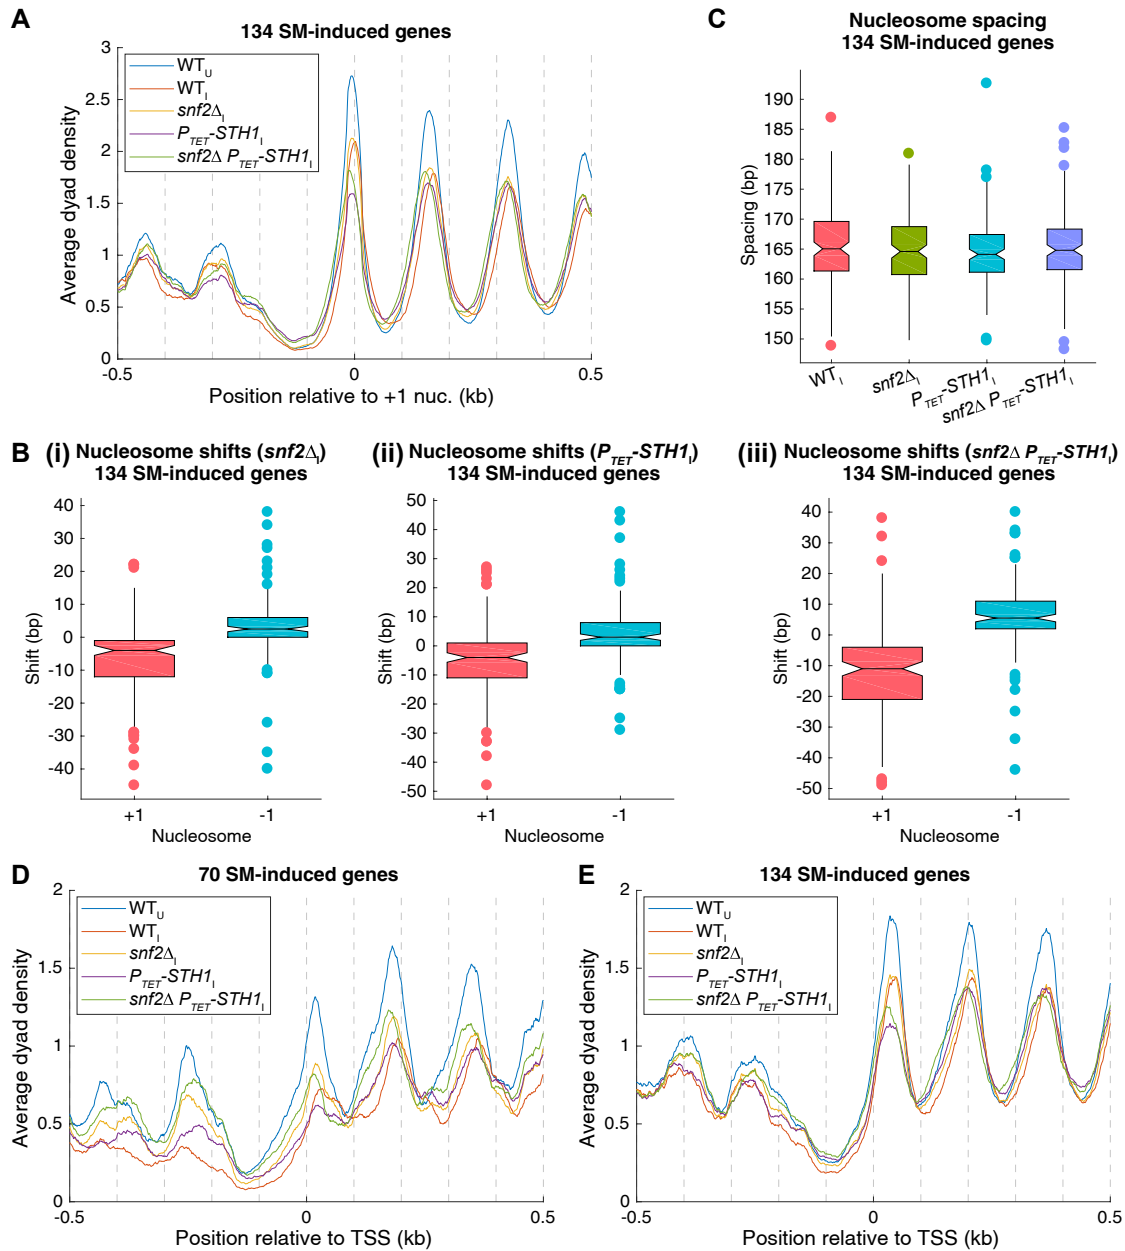

**Figure S5. Supporting evidence for defects in re-positioning of promoter nucleosomes at SM-induced genes in the three remodeler mutants.** (A) Average dyad density plot aligned to the +1 nucleosome for 134 SM-induced genes for the indicated yeast strains, calculated as in Fig. 1E. (B-C) Boxplots depicting change in +1 and -1 nucleosome positions (B) or nucleosome spacing (C) for the 134 SM-induced genes in the indicated remodeler mutants under inducing conditions versus WT<sub>1</sub> cells, determined as in Figs. 1F-G. (D-E) Average dyad densities aligned to the TSS were calculated from MNase-ChIP-seq as in Fig. 1E for the (D) 70 and 134 (E) SM-induced genes in the indicated yeast strains. All average dyad profiles were smoothed using a moving average filter with a span of 31 bp.



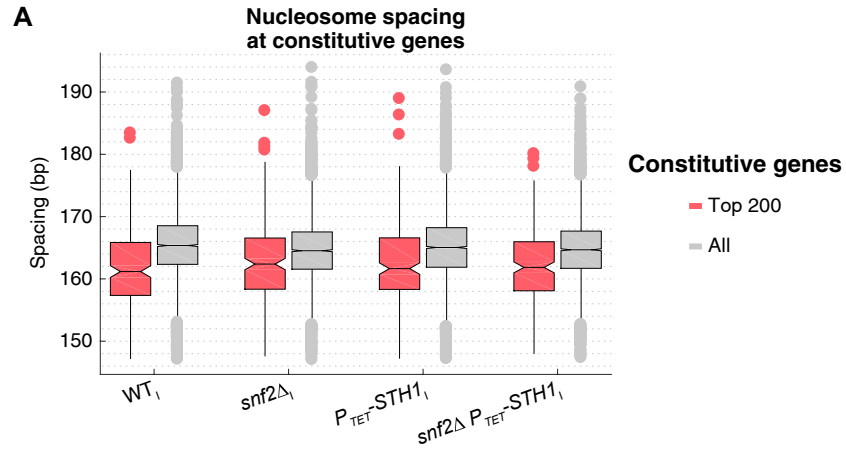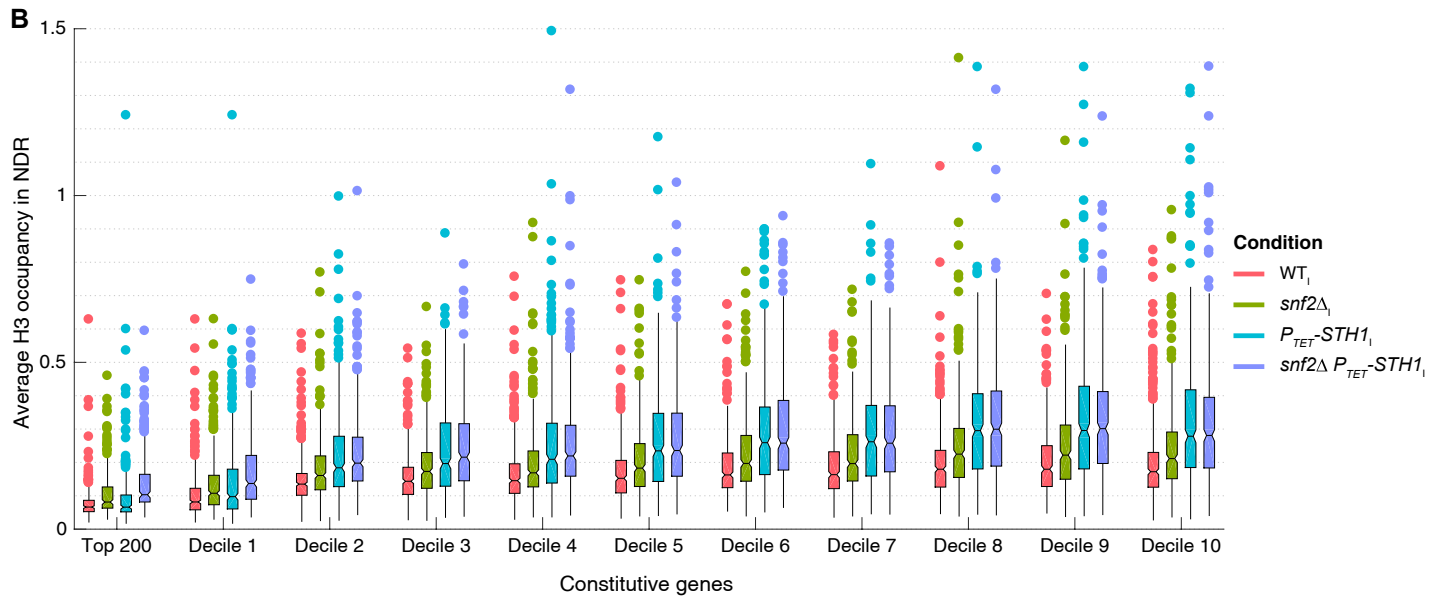

**Figure S6. Supporting evidence for defects in clearing nucleosomes from NDRs in the remodeler mutants at only the most highly expressed subset of constitutive genes. (A)**

Boxplots depicting nucleosome spacing in indicated strains, calculated from H3 MNase-ChIP-seq data for all 3619 constitutive genes (grey) or the Top 200 expressed constitutive genes (red). (B)

Notched box plots of H3 occupancies per nucleotide in NDRs calculated from H3 MNase-ChIP-seq data for the indicated strains, for deciles of 3619 constitutive genes sorted by Rpb3 occupancies as in Fig. 3C.

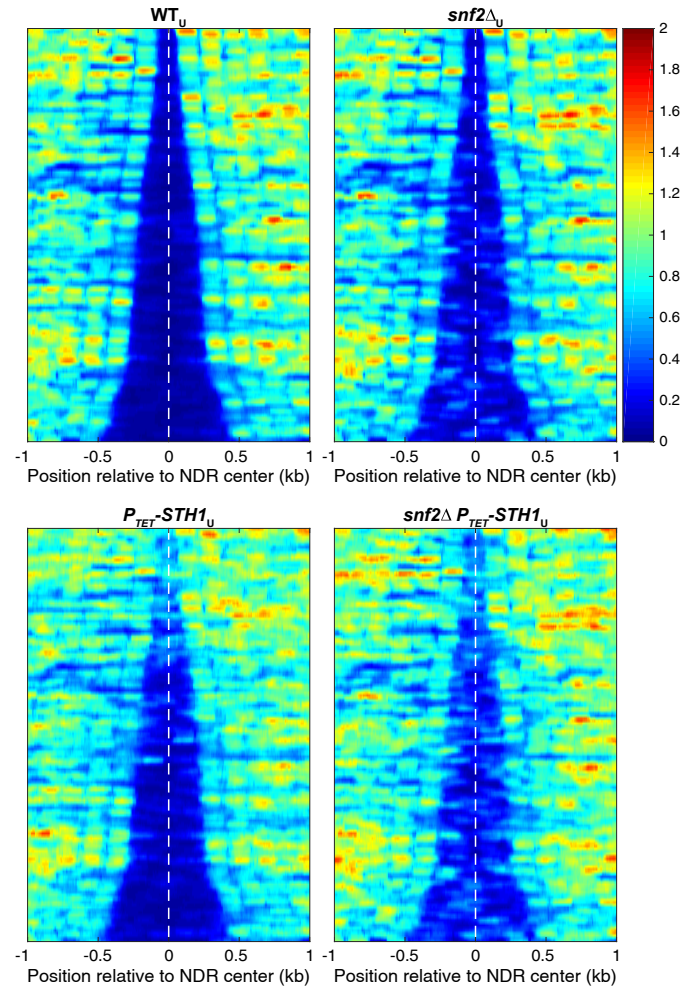

**Figure S7. Appearance of new nucleosome peaks in the NDRs of certain constitutively expressed genes in the *snf2Δ P<sub>TET</sub>-STH1* double mutant under non-inducing conditions.** Heat map depictions of H3 occupancies calculated from MNase-ChIP-seq data of the indicated yeast strains for a group of 162 genes selected from among all genes that exhibit nucleosome peaks in *snf2Δ P<sub>TET</sub>-STH1* cells not evident in WT cells, aligned to NDR centers; sorting genes by NDR width uninduced WT cells, and color-coded as shown on right.

Table S1. Yeast strains used in this study

| Strain Name                   | Parent | Genotype                                                                                       | Source               |
|-------------------------------|--------|------------------------------------------------------------------------------------------------|----------------------|
| <b>F729/</b><br><b>BY4741</b> | NA     | <i>MATa his3Δ1 leu2Δ0 met15Δ0 ura3Δ0</i>                                                       | Research genetics    |
| <b>F748</b>                   | BY4741 | <i>MATa his3Δ1 leu2Δ0 met15Δ0 ura3Δ0 snf2Δ::kanMX4</i>                                         | Research genetics    |
| <b>HQ1632</b>                 | BY4741 | <i>MATa his3Δ1 leu2Δ0 met15Δ0 ura3Δ0 HIS3MX6::P<sub>TET</sub>-STH1</i>                         | This study           |
| <b>HQ1660</b>                 | F748   | <i>MATa his3Δ1 leu2Δ0 met15Δ0 ura3Δ0 snf2Δ::kanMX4</i><br><i>HIS3MX6::P<sub>TET</sub>-STH1</i> | This study           |
| <b>HQY367</b>                 | BY4741 | <i>MATa his3Δ1 leu2Δ0 met15Δ0 ura3Δ0 SNF2-myc<sub>13</sub>::HIS3MX6</i>                        | Swanson et al., 2003 |
| <b>HQY459</b>                 | BY4741 | <i>MATa his3Δ1 leu2Δ0 met15Δ0 ura3Δ0 STH1-myc<sub>13</sub>::HIS3MX6</i>                        | Swanson et al., 2003 |

Table S2. ChIP-seq replicates

Sonication H3/ChIP-seq

| Genotype                                  | Sample ID | SM | Dox | All PE reads | rmdup PE reads | Source           |
|-------------------------------------------|-----------|----|-----|--------------|----------------|------------------|
| WT <sub>U</sub>                           | AGH58_02  | -  | -   | 29625671     | 8011769        | This study       |
| WT <sub>U</sub>                           | AGH62_01  | -  | -   | 14993257     | 8597216        | This study       |
| WT <sub>U</sub>                           | AGH62_02  | -  | -   | 19032734     | 9965205        | This study       |
| snf2Δ <sub>U</sub>                        | AGH57_4   | -  | -   | 23934378     | 15075565       | This study       |
| snf2Δ <sub>U</sub>                        | AGH57_5   | -  | -   | 24825347     | 15914213       | This study       |
| snf2Δ <sub>U</sub>                        | AGH57_6   | -  | -   | 26587486     | 16214184       | This study       |
| P <sub>TET</sub> -STH1 <sub>U</sub>       | AGH57_7   | -  | +   | 23796469     | 14253969       | This study       |
| P <sub>TET</sub> -STH1 <sub>U</sub>       | AGH57_8   | -  | +   | 25699355     | 16305759       | This study       |
| P <sub>TET</sub> -STH1 <sub>U</sub>       | AGH57_9   | -  | +   | 22301447     | 13116189       | This study       |
| snf2Δ P <sub>TET</sub> -STH1 <sub>U</sub> | AGH57_10  | -  | +   | 28571112     | 15491126       | This study       |
| snf2Δ P <sub>TET</sub> -STH1 <sub>U</sub> | AGH57_11  | -  | +   | 26364759     | 17057518       | This study       |
| snf2Δ P <sub>TET</sub> -STH1 <sub>U</sub> | AGH57_12  | -  | +   | 24518529     | 15058743       | This study       |
| WT <sub>I</sub>                           | AGH58_04  | +  | -   | 20620578     | 5466934        | This study       |
| WT <sub>I</sub>                           | AGH62_03  | +  | -   | 18617080     | 8200524        | This study       |
| WT <sub>I</sub>                           | AGH62_08  | +  | -   | 19798491     | 5044590        | This study       |
| snf2Δ <sub>I</sub>                        | AGH59_01  | +  | -   | 14174694     | 7052399        | This study       |
| snf2Δ <sub>I</sub>                        | AGH59_02  | +  | -   | 14573693     | 6456125        | This study       |
| snf2Δ <sub>I</sub>                        | AGH62_05  | +  | -   | 20877009     | 10613818       | This study       |
| snf2Δ <sub>I</sub>                        | AGH04_01  | +  | -   | 15597956     | 11985536       | Qiu et al., 2015 |
| snf2Δ <sub>I</sub>                        | AGH04_02  | +  | -   | 17071372     | 13099928       | Qiu et al., 2015 |
| snf2Δ <sub>I</sub>                        | AGH25_01  | +  | -   | 24839200     | 11548218       | Qiu et al., 2015 |
| P <sub>TET</sub> -STH1 <sub>I</sub>       | AGH50_01  | +  | +   | 23176098     | 12629620       | This study       |
| P <sub>TET</sub> -STH1 <sub>I</sub>       | AGH54_03  | +  | +   | 22858502     | 9011007        | This study       |
| P <sub>TET</sub> -STH1 <sub>I</sub>       | AGH50_06  | +  | +   | 26443231     | 6284621        | This study       |
| snf2Δ P <sub>TET</sub> -STH1 <sub>I</sub> | AGH54_01  | +  | +   | 23674356     | 12035478       | This study       |
| snf2Δ P <sub>TET</sub> -STH1 <sub>I</sub> | AGH54_02  | +  | +   | 27937517     | 13179773       | This study       |
| snf2Δ P <sub>TET</sub> -STH1 <sub>I</sub> | AGH50_10  | +  | +   | 30027139     | 5408247        | This study       |

Table S2. ChIP-seq replicates

Sonication H2B/ChIP-seq

| Genotype                                  | Sample ID | SM | Dox | All PE reads | rmdup PE reads | Source     |
|-------------------------------------------|-----------|----|-----|--------------|----------------|------------|
| WT <sub>U</sub>                           | AGH60_02  | -  | -   | 19628438     | 8322922        | This study |
| WT <sub>U</sub>                           | AGH45_01  | -  | -   | 12208679     | 7927728        | This study |
| WT <sub>U</sub>                           | AGH45_02  | -  | -   | 11961060     | 7894189        | This study |
| snf2Δ <sub>U</sub>                        | AGH67_4   | -  | -   | 16534315     | 9227553        | This study |
| snf2Δ <sub>U</sub>                        | AGH67_5   | -  | -   | 15540476     | 9198843        | This study |
| snf2Δ <sub>U</sub>                        | AGH67_6   | -  | -   | 17857046     | 9504690        | This study |
| P <sub>TET</sub> -STH1 <sub>U</sub>       | AGH67_7   | -  | +   | 15288646     | 7792881        | This study |
| P <sub>TET</sub> -STH1 <sub>U</sub>       | AGH67_8   | -  | +   | 15109854     | 7489350        | This study |
| P <sub>TET</sub> -STH1 <sub>U</sub>       | AGH67_9   | -  | +   | 15934988     | 7644091        | This study |
| snf2Δ P <sub>TET</sub> -STH1 <sub>U</sub> | AGH67_10  | -  | +   | 19450474     | 9425352        | This study |
| snf2Δ P <sub>TET</sub> -STH1 <sub>U</sub> | AGH67_11  | -  | +   | 19924639     | 10652912       | This study |
| snf2Δ P <sub>TET</sub> -STH1 <sub>U</sub> | AGH67_12  | -  | +   | 16494713     | 8657324        | This study |
| WT <sub>I</sub>                           | AGH60_04  | +  | -   | 21838062     | 15319809       | This study |
| WT <sub>I</sub>                           | AGH45_03  | +  | -   | 11376591     | 8144250        | This study |
| WT <sub>I</sub>                           | AGH62_11  | +  | -   | 20225185     | 3857138        | This study |
| snf2Δ <sub>I</sub>                        | AGH60_11  | +  | -   | 19367826     | 13137056       | This study |
| snf2Δ <sub>I</sub>                        | AGH60_12  | +  | -   | 19010109     | 12759019       | This study |
| snf2Δ <sub>I</sub>                        | AGH45_10  | +  | -   | 14370641     | 9342565        | This study |
| snf2Δ <sub>I</sub>                        | AGH48_07  | +  | -   | 28893689     | 12565519       | This study |
| snf2Δ <sub>I</sub>                        | AGH48_08  | +  | -   | 27731080     | 10801903       | This study |
| snf2Δ <sub>I</sub>                        | AGH48_09  | +  | -   | 26318644     | 10449013       | This study |
| P <sub>TET</sub> -STH1 <sub>I</sub>       | AGH63_04  | +  | +   | 22504481     | 8826667        | This study |
| P <sub>TET</sub> -STH1 <sub>I</sub>       | AGH63_05  | +  | +   | 21296504     | 8101558        | This study |
| P <sub>TET</sub> -STH1 <sub>I</sub>       | AGH63_06  | +  | +   | 21746584     | 6489767        | This study |
| snf2Δ P <sub>TET</sub> -STH1 <sub>I</sub> | AGH63_07  | +  | +   | 24234763     | 10877407       | This study |
| snf2Δ P <sub>TET</sub> -STH1 <sub>I</sub> | AGH63_08  | +  | +   | 22770272     | 10101318       | This study |
| snf2Δ P <sub>TET</sub> -STH1 <sub>I</sub> | AGH63_09  | +  | +   | 21969413     | 10797105       | This study |

Table S2. ChIP-seq replicates

**Sonication Rpb3/ChIP-seq**

| <b>Genotype</b>                               | <b>Sample ID</b> | <b>SM</b> | <b>Dox</b> | <b>All PE reads</b> | <b>rmdup PE reads</b> | <b>Source</b>    |
|-----------------------------------------------|------------------|-----------|------------|---------------------|-----------------------|------------------|
| <b>WT<sub>U</sub></b>                         | AGH03_1          | -         | -          | 12103981            | 7624104               | Qiu et al., 2015 |
| <b>WT<sub>U</sub></b>                         | AGH03_2          | -         | -          | 15621065            | 10271685              | Qiu et al., 2015 |
| <b>WT<sub>U</sub></b>                         | AGH03_3          | -         | -          | 14624526            | 8895936               | Qiu et al., 2015 |
| <b>WT<sub>I</sub></b>                         | AGH03_4          | +         | -          | 10978154            | 7859118               | Qiu et al., 2015 |
| <b>WT<sub>I</sub></b>                         | AGH03_5          | +         | -          | 16862702            | 11526037              | Qiu et al., 2015 |
| <b>WT<sub>I</sub></b>                         | AGH03_6          | +         | -          | 14660604            | 10042576              | Qiu et al., 2015 |
| <b>snf2Δ<sub>I</sub></b>                      | AGH12_7          | +         | -          | 14213867            | 10131580              | Qiu et al., 2015 |
| <b>snf2Δ<sub>I</sub></b>                      | AGH12_8          | +         | -          | 12857958            | 8200570               | Qiu et al., 2015 |
| <b>snf2Δ<sub>I</sub></b>                      | AGH28_1          | +         | -          | 13651250            | 1859651               | Qiu et al., 2015 |
| <b>P<sub>TET</sub>-STH1<sub>I</sub></b>       | AGH51_01         | +         | +          | 6836169             | 1768416               | This study       |
| <b>P<sub>TET</sub>-STH1<sub>I</sub></b>       | AGH51_05         | +         | +          | 12990191            | 2395951               | This study       |
| <b>P<sub>TET</sub>-STH1<sub>I</sub></b>       | AGH51_06         | +         | +          | 13376423            | 2103356               | This study       |
| <b>snf2Δ P<sub>TET</sub>-STH1<sub>I</sub></b> | AGH51_02         | +         | +          | 12853198            | 1909934               | This study       |
| <b>snf2Δ P<sub>TET</sub>-STH1<sub>I</sub></b> | AGH51_09         | +         | +          | 11798395            | 1996785               | This study       |
| <b>snf2Δ P<sub>TET</sub>-STH1<sub>I</sub></b> | AGH51_10         | +         | +          | 12653664            | 2171622               | This study       |



Table S2. ChIP-seq replicates

MNase H3/ChIP-seq

| Genotype                                  | Sample ID | SM | Dox | All PE reads | rmdup PE reads | Source     |
|-------------------------------------------|-----------|----|-----|--------------|----------------|------------|
| WT <sub>U</sub>                           | AGH68_01  | -  | -   | 21155789     | 16387173       | This study |
| WT <sub>U</sub>                           | AGH68_02  | -  | -   | 29890860     | 21290074       | This study |
| WT <sub>U</sub>                           | AGH73_01  | -  | -   | 22748400     | 13752475       | This study |
| WT <sub>U</sub>                           | AGH73_02  | -  | -   | 33931620     | 20843860       | This study |
| WT <sub>I</sub>                           | AGH68_03  | +  | -   | 22985503     | 17204691       | This study |
| WT <sub>I</sub>                           | AGH68_04  | +  | -   | 19959153     | 15376225       | This study |
| WT <sub>I</sub>                           | AGH73_03  | +  | -   | 26493831     | 17942518       | This study |
| snf2Δ <sub>I</sub>                        | AGH68_05  | +  | -   | 20896164     | 15789365       | This study |
| snf2Δ <sub>I</sub>                        | AGH68_06  | +  | -   | 23587865     | 18055776       | This study |
| snf2Δ <sub>I</sub>                        | AGH73_04  | +  | -   | 30193725     | 20155496       | This study |
| snf2Δ <sub>I</sub>                        | AGH73_05  | +  | -   | 28834376     | 19622426       | This study |
| snf2Δ <sub>I</sub>                        | AGH73_10  | +  | -   | 27351420     | 18319655       | This study |
| P <sub>TET</sub> -STH1 <sub>I</sub>       | AGH68_07  | +  | +   | 21614150     | 16939365       | This study |
| P <sub>TET</sub> -STH1 <sub>I</sub>       | AGH68_08  | +  | +   | 24081014     | 18755148       | This study |
| P <sub>TET</sub> -STH1 <sub>I</sub>       | AGH73_06  | +  | +   | 29619041     | 19719008       | This study |
| P <sub>TET</sub> -STH1 <sub>I</sub>       | AGH73_07  | +  | +   | 26053659     | 18067975       | This study |
| P <sub>TET</sub> -STH1 <sub>I</sub>       | AGH73_12  | +  | +   | 24618600     | 16927985       | This study |
| snf2Δ P <sub>TET</sub> -STH1 <sub>I</sub> | AGH68_09  | +  | +   | 24352916     | 18823892       | This study |
| snf2Δ P <sub>TET</sub> -STH1 <sub>I</sub> | AGH68_10  | +  | +   | 35625027     | 24578682       | This study |
| snf2Δ P <sub>TET</sub> -STH1 <sub>I</sub> | AGH68_11  | +  | +   | 26104427     | 19584798       | This study |
| snf2Δ P <sub>TET</sub> -STH1 <sub>I</sub> | AGH68_12  | +  | +   | 19106755     | 11875757       | This study |
| snf2Δ P <sub>TET</sub> -STH1 <sub>I</sub> | AGH73_08  | +  | +   | 27010389     | 18495503       | This study |
| snf2Δ P <sub>TET</sub> -STH1 <sub>I</sub> | AGH73_09  | +  | +   | 25011131     | 17657515       | This study |
| snf2Δ <sub>U</sub>                        | AGH81_02  | -  | -   | 26607113     | 15776809       | This study |
| snf2Δ <sub>U</sub>                        | AGH81_03  | -  | -   | 20857397     | 12924899       | This study |
| snf2Δ <sub>U</sub>                        | AGH87_01  | -  | -   | 22806847     | 16781714       | This study |
| snf2Δ <sub>U</sub>                        | AGH87_02  | -  | -   | 30330091     | 19522950       | This study |
| P <sub>TET</sub> -STH1 <sub>U</sub>       | AGH81_04  | -  | +   | 20916061     | 9659542        | This study |
| P <sub>TET</sub> -STH1 <sub>U</sub>       | AGH81_06  | -  | +   | 26818025     | 15411529       | This study |
| snf2Δ P <sub>TET</sub> -STH1 <sub>U</sub> | AGH81_07  | -  | +   | 22293847     | 9415935        | This study |
| snf2Δ P <sub>TET</sub> -STH1 <sub>U</sub> | AGH81_08  | -  | +   | 21967556     | 10049178       | This study |
| snf2Δ P <sub>TET</sub> -STH1 <sub>U</sub> | AGH87_03  | -  | +   | 19552427     | 13629844       | This study |

---

|                                               |          |   |   |          |          |            |
|-----------------------------------------------|----------|---|---|----------|----------|------------|
| <b>snf2Δ P<sub>TET</sub>-STH1<sub>U</sub></b> | AGH87_04 | - | + | 22712961 | 15551050 | This study |
| <b>snf2Δ P<sub>TET</sub>-STH1<sub>U</sub></b> | AGH87_09 | - | + | 16429859 | 11194834 | This study |
| <b>snf2Δ P<sub>TET</sub>-STH1<sub>U</sub></b> | AGH87_10 | - | + | 25099770 | 16500031 | This study |

---
